# Supplementary material for: PD-L1ATTAC mice reveal the potential of depleting PD-L1 expressing cells in cancer therapy
Source: Aging (Albany NY). 2023 Mar 22;15(6):1791–807. doi: 10.18632/aging.204598 (PMC10085585; doi:10.18632/aging.204598)
Supplement: Supplementary Figures [file aging-15-204598-s002.pdf]

## SUPPLEMENTARY FIGURES

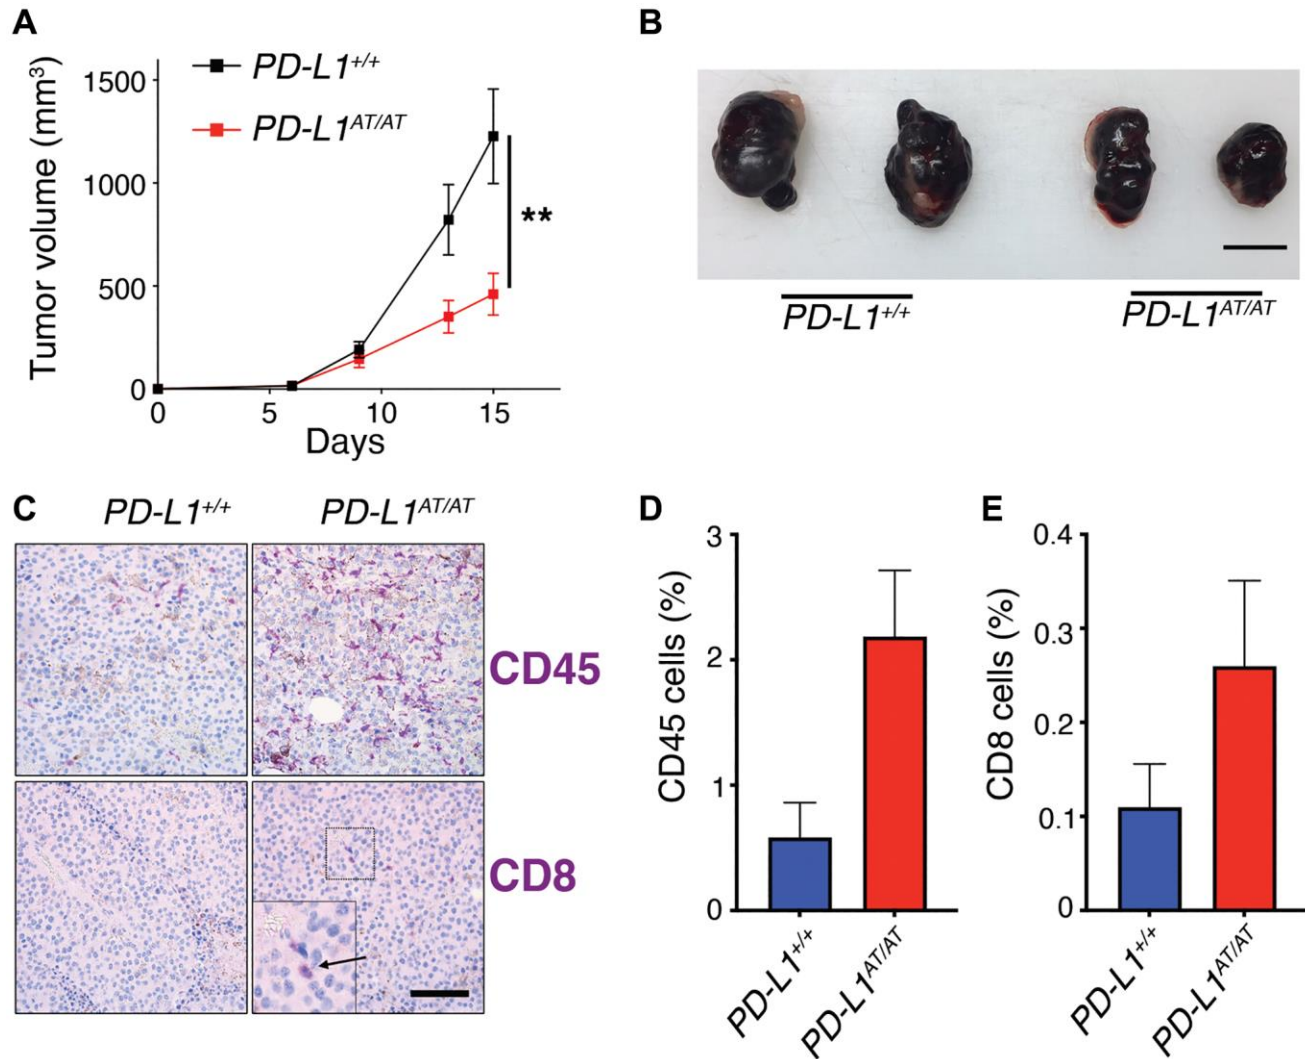

**Supplementary Figure 1. Resistance to B16-F10 melanoma allografts in *PD-L1*<sup>AT/AT</sup> mice.** (A) Growth of B16-F10 allografts subcutaneously implanted into the left flank of *PD-L1*<sup>+/+</sup> and *PD-L1*<sup>AT/AT</sup> mice. The *p* value was calculated with mixed-effects analysis. \*\**p* < 0.01 (B) Representative picture of the melanoma allografts from these analyses isolated at day 15. Scale bar (black) indicates 1 cm. (C) Immunohistochemistry of CD45 and CD8 in B16-F10 allografts isolated at day 15 from *PD-L1*<sup>+/+</sup> and *PD-L1*<sup>AT/AT</sup> mice. An inset is magnified to illustrate the presence of tumor-infiltrating CD8+ cytotoxic T cells in the allografts grown in mutant mice. Scale bar (black) indicates 100 μm. (D, E) Quantification of CD45+ (D) and CD8+ (E) cells from the analyses shown in (C).

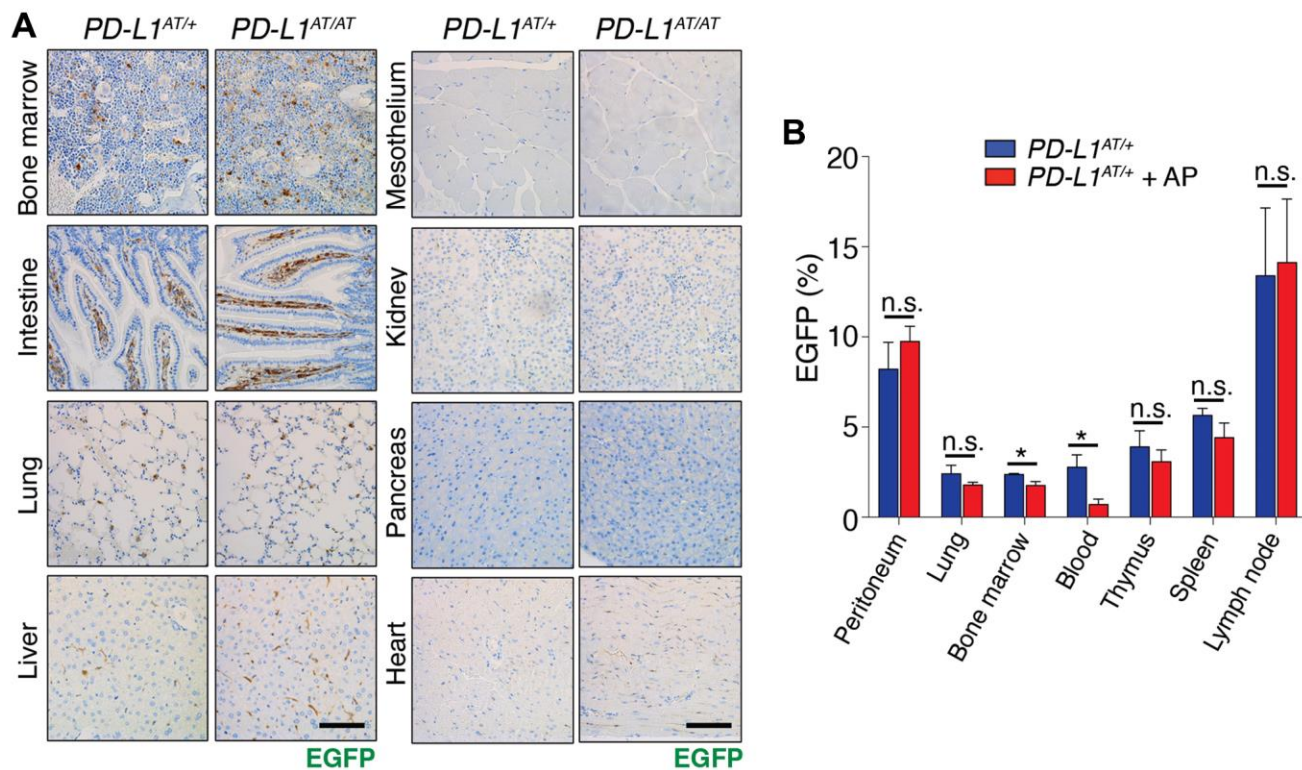

**Supplementary Figure 2. Characterization of the *PD-L1<sup>ATTAC</sup>* mouse model.** (A) EGFP immunohistochemistry (IHC) from the bone marrow, intestine, lung, liver, mesothelium, kidney, pancreas and heart of *PD-L1<sup>AT/+</sup>* and *PD-L1<sup>AT/AT</sup>* mice. Scale bar (black) indicates 100  $\mu$ m. (B) Percentage of EGFP+ cells as revealed by FACS in the indicated organs from control and AP-treated *PD-L1<sup>AT/+</sup>* mice. AP20187 (2.5 mg/kg) was administered via i.v. for three consecutive days. The  $p$  value was calculated with unpaired  $t$ -test. Abbreviation: n.s.: non-significant, \* $p < 0.05$ .

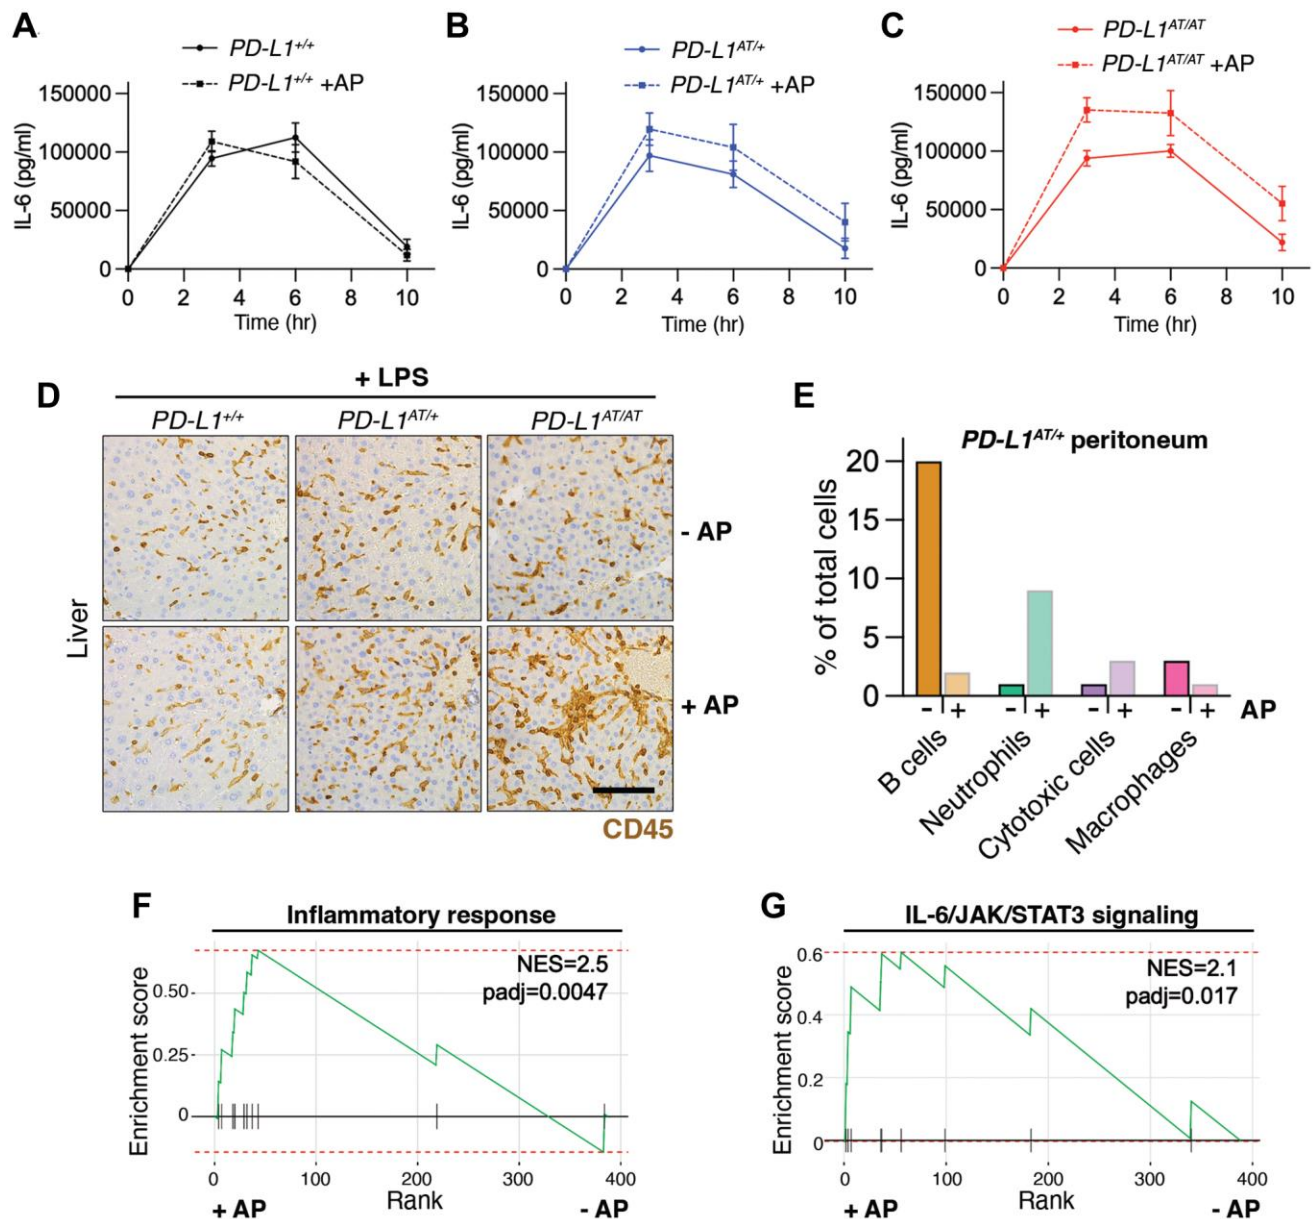

**Supplementary Figure 3. Depletion of PD-L1<sup>+</sup> cells sensitizes mice to LPS.** (A–C) Kinetics of IL-6 accumulation and clearance in plasma isolated from *PD-L1*<sup>+/+</sup>, *PD-L1*<sup>AT/+</sup> and *PD-L1*<sup>AT/AT</sup> mice after LPS injection as determined by ELISA. (D) IHC of CD45 in the livers of *PD-L1*<sup>+/+</sup>, *PD-L1*<sup>AT/+</sup> and *PD-L1*<sup>AT/AT</sup> mice after LPS injection. Mice were treated via i.p. with AP (2.5 mg/kg) for 3 days and i.p. with 10 mg/kg LPS on the following day. Scale bar (black) indicates 100  $\mu$ m. (E) Quantification from the single-cell sequencing analysis shown in Figure 4E, indicating the changes in the cell repertoire in the peritoneum from *PD-L1*<sup>AT/+</sup> mice upon AP treatment. (F, G) Pre-ranked GSEA on the genes from the hallmarks "Inflammatory response" (F) and "IL-6/JAK/STAT3 signaling" (G) obtained from scRNAseq data comparing the transcriptomes of cytotoxic cells from *PD-L1*<sup>AT/+</sup> mice upon AP treatment.

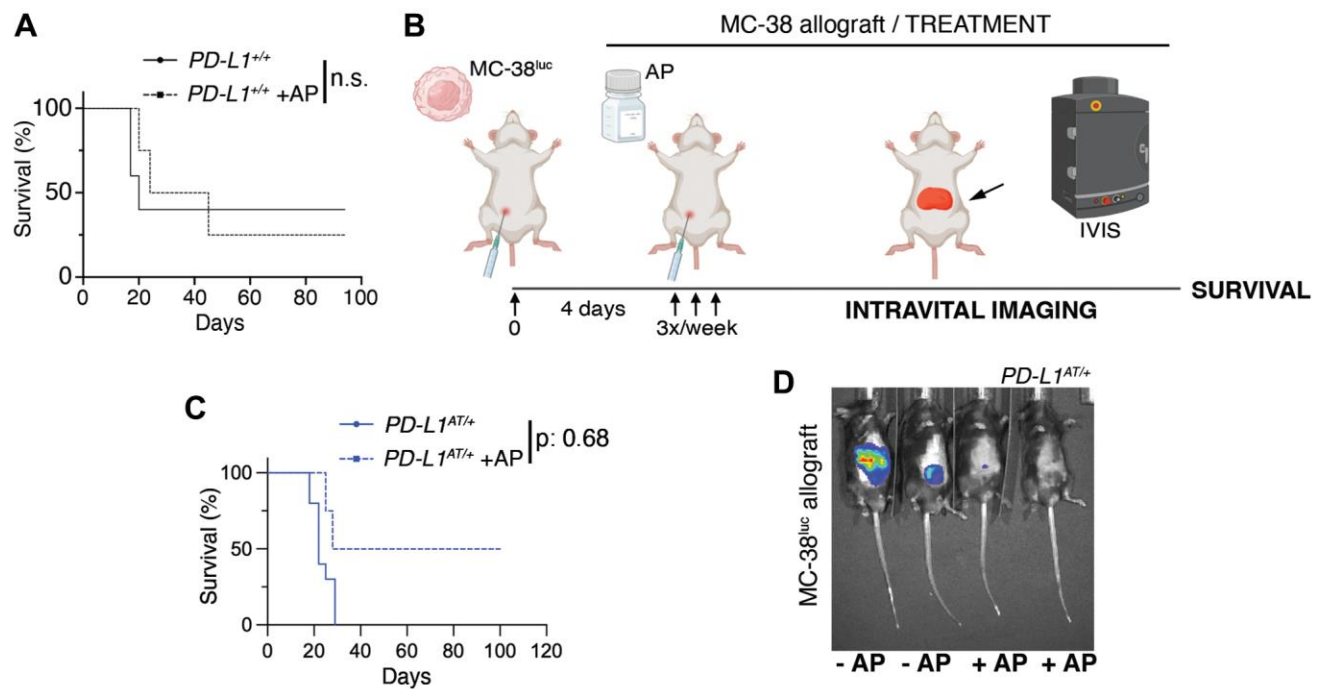

**Supplementary Figure 4. Impact of depleting PD-L1<sup>+</sup> cells in MC-38<sup>luc</sup> allografts.** (A) Kaplan-Meier survival curve of control and AP20187-pretreated  $PD-L1^{+/+}$  mice after i.p. inoculation of MC-38<sup>luc</sup> allografts. The  $p$  value was calculated with the Mantel-Coxlog rank test. Abbreviation: n.s.: non-significant. (B) Schematic overview of the treatment experimental workflow.  $5 \times 10^5$  MC-38<sup>luc</sup> cells were intraperitoneally injected into mice. 4 days later mice were injected i.p. with AP20187 (2.5 mg/kg) 3 times a week for the duration of the experiment. (C) Kaplan-Meier survival curve of control and AP20187-pretreated  $PD-L1^{AT/+}$  mice after i.p. inoculation of MC-38<sup>luc</sup> allografts in the treatment model. The  $p$  value was calculated with the Mantel-Coxlog rank test. (D) Representative IVIS image of mice from the experiment defined in (C).
